# Supplementary material
Source: PubMed Central journal article supplement (PMC2922589)
Supplement: 1003009107_pnas.1003009107_SI.pdf [file 1003009107_pnas.1003009107_SI.pdf]

# Supporting Information

Corma et al. 10.1073/pnas.1003009107

## SI Text

**SDAs Synthesis.** Diphenyldimethylphosphonium hydroxide ( $\text{Me}_2\text{Ph}_2\text{POH}$ ) was obtained by methylation of diphenylphosphine with methyl iodide in chloroform in the presence of  $\text{K}_2\text{CO}_3$  as previously described for the synthesis of ITQ-27.

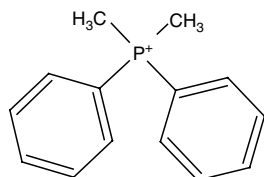

Diphenylphosphine, 10.80 g (0.058 mol), was dissolved in 50 mL of chloroform under nitrogen atmosphere. Then, 9.55 g of potassium carbonate sesquihydrate were added, and the mixture was stirred. Finally, 24.60 g (0.173 mol) of methyl iodide were added dropwise. After 48 hours, 8 g of methyl iodide were added again, and the mixture was left for a total time of five days.

The isopropanol was then eliminated and the solid washed with diethyl ether. Next, the product was dissolved in chloroform. The chloroform was evaporated, and the solid washed with diethyl ether and then dried under vacuum to give 18.426 g of diphenyldimethylphosphonium iodide (93.2% wt yield).

Next, 18.426 g of diphenyldimethylphosphonium iodide, previously dissolved in water, were converted to the corresponding hydroxide with 58.15 g of an anionic exchange resin in batch overnight, yielding 183.52 g of a 0.27 M solution of diphenyldimethylphosphonium hydroxide (92% of exchange yield) that was used as the structure directing agent (SDA) source.

Diphenyldiethylphosphonium hydroxide ( $\text{Et}_2\text{Ph}_2\text{POH}$ ) was obtained by ethylation of diphenylphosphine with ethyl iodide in ethanol in the presence of  $\text{K}_2\text{CO}_3$ .

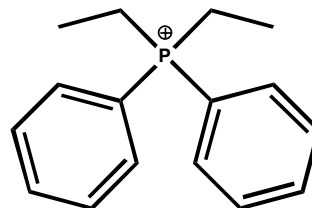

Diphenylphosphine, 50 g (0.27 mol), was mixed with 150 mL of ethanol under nitrogen atmosphere. Then, 37.12 g of potassium carbonate were added, and the mixture was stirred. Finally, 125.73 g (0.81 mol) of ethyl iodide were added dropwise. After 48 hours at 50 °C, the ethanol was eliminated and the solid washed with diethyl ether. The product was then dissolved in chloroform. The chloroform was evaporated and the solid washed with diethyl ether and then dried under vacuum to give 98.45 g of diphenyldiethylphosphonium iodide (98.5% wt yield).

Next, 98.45 g of diphenyldiethylphosphonium iodide, previously dissolved in water, were converted to the corresponding hydroxide with 270 g of an anionic exchange resin in batch overnight, yielding 271.75 g of a 0.94 M solution of diphenyldiethylphosphonium hydroxide (96% of exchange yield) that was used as the SDA source.

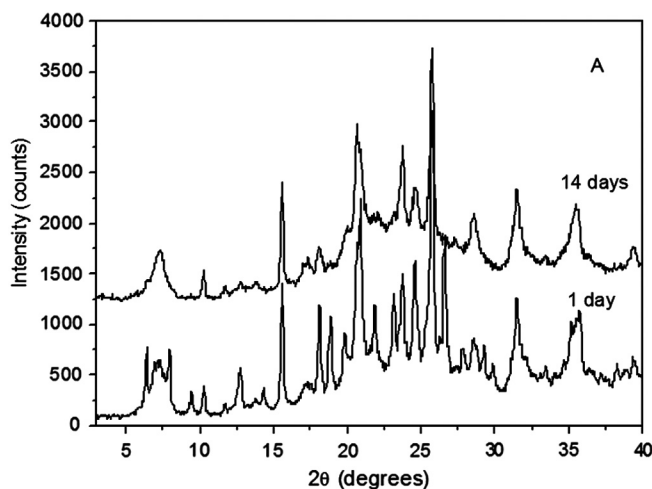

Fig. S1. X-ray diffraction patterns from gels with a Si/Ge = 5 using (A)  $\text{Et}_2\text{Ph}_2\text{POH}$  as the SDA.



**Table S1. Final atomic coordinates from Rietveld refinement of calcined ITQ-40**

| Atom  | No. | x          | y          | z          | $U_{iso}$ | Occupancy |
|-------|-----|------------|------------|------------|-----------|-----------|
| Si,Ge | 1   | 0.4716(7)  | 0.3314(7)  | 0.0335(5)  | 0.046(8)  | 0.574*    |
| Si,Ge | 2   | 0.3660(9)  | 0.4363(9)  | 0.0628(4)  | 0.046(8)  | 0.574*    |
| Si,Ge | 3   | 0.2266(5)  | 0.4531(9)  | 0.1208(5)  | 0.046(8)  | 0.574*    |
| Si,Ge | 4   | 0.2728(5)  | 0.5456(11) | 0.2045(5)  | 0.046(8)  | 0.574*    |
| Si,Ge | 5   | 0.3333     | 0.6667     | 0.0788(9)  | 0.046(8)  | 0.574*    |
| O     | 11  | 0.4659(39) | 0.2329(20) | 0.0515(9)  | 0.178(37) | 1         |
| O     | 12  | 0.5819(18) | 0.4181(18) | 0.0415(20) | 0.178(37) | 1         |
| O     | 13  | 0.4501(44) | 0.3237(25) | 0.9823(7)  | 0.178(37) | 1         |
| O     | 14  | 0.4046(42) | 0.3595(35) | 0.0624(15) | 0.178(37) | 1         |
| O     | 15  | 0.2907(17) | 0.4087(17) | 0.1022(7)  | 0.178(37) | 1         |
| O     | 16  | 0.4623(27) | 0.5377(27) | 0.0753(16) | 0.178(37) | 1         |
| O     | 17  | 0.2270(9)  | 0.4540(17) | 0.1724(5)  | 0.178(37) | 1         |
| O     | 18  | 0.2809(2)  | 0.5618(4)  | 0.1019(9)  | 0.178(37) | 1         |
| O     | 19  | 0.2449(11) | 0.4898(22) | 0.2500     | 0.178(37) | 1         |
| O     | 20  | 0.2219(13) | 0.6110(6)  | 0.2001(11) | 0.178(37) | 1         |
| O     | 21  | 0.3333     | 0.6667     | 0.0285(9)  | 0.178(37) | 1         |

Estimated standard deviations for the last digit are given in the parentheses. Atoms 1 and 2 are in the double four-ring, atom 4 is in the double three-ring, and atoms 3 and 5 are in the [6<sup>4</sup>5<sup>3</sup>4<sup>3</sup>3] cage

\*Occupancy is for Si; the remainder, 0.426, is for Ge.

**Table S2. Interatomic distances and angles from Rietveld refinement of calcined ITQ-40**

|             |           |             |           |
|-------------|-----------|-------------|-----------|
| Si1-O11     | 1.678(6)  | O11-Si1-O12 | 106.6(15) |
| Si1-O12     | 1.676(6)  | O11-Si1-O13 | 110.9(15) |
| Si1-O13     | 1.677(6)  | O11-Si1-O14 | 110.4(13) |
| Si1-O14     | 1.675(6)  | O12-Si1-O13 | 108.2(16) |
|             |           | O12-Si1-O14 | 105.2(15) |
| Si2-O13     | 1.676(6)  | O13-Si1-O14 | 115.0(14) |
| Si2-O14     | 1.677(6)  |             |           |
| Si2-O15     | 1.669(6)  | O13-Si2-O14 | 115.8(16) |
| Si2-O16     | 1.678(6)  | O13-Si2-O15 | 113.1(15) |
|             |           | O13-Si2-O16 | 108.8(20) |
| Si3-O15     | 1.668(4)  | O14-Si2-O15 | 108.1(10) |
| Si3-O15     | 1.668(4)  | O14-Si2-O16 | 103.1(20) |
| Si3-O17     | 1.663(6)  | O15-Si2-O16 | 107.1(15) |
| Si3-O18     | 1.665(6)  |             |           |
|             |           | O15-Si3-O15 | 117.0(23) |
| Si4-O17     | 1.666(6)  | O15-Si3-O17 | 111.2(10) |
| Si4-O19     | 1.666(6)  | O15-Si3-O18 | 102.9(9)  |
| Si4-O20     | 1.669(4)  | O15-Si3-O17 | 111.2(10) |
| Si4-O20     | 1.669(4)  | O15-Si3-O18 | 102.9(9)  |
|             |           | O17-Si3-O18 | 111.0(17) |
| Si5-O18     | 1.669(6)  |             |           |
| Si5-O18     | 1.669(6)  | O17-Si4-O19 | 99.8(8)   |
| Si5-O18     | 1.669(6)  | O17-Si4-O20 | 112.7(12) |
| Si5-O21     | 1.619(6)  | O17-Si4-O20 | 112.6(12) |
|             |           | O19-Si4-O20 | 110.0(12) |
| Si1-O11-Si1 | 139.3(21) | O19-Si4-O20 | 110.0(12) |
| Si1-O12-Si1 | 150.9(26) | O20-Si4-O20 | 111.1(19) |
| Si1-O13-Si2 | 152.7(20) |             |           |
| Si1-O14-Si2 | 139.8(17) | O18-Si5-O18 | 101.8(3)  |
| Si2-O15-Si3 | 134.4(16) | O18-Si5-O18 | 101.8(3)  |
| Si2-O16-Si2 | 151.9(32) | O18-Si5-O21 | 116.4(3)  |
| Si3-O17-Si4 | 128.8(18) | O18-Si5-O18 | 101.8(3)  |
| Si3-O18-Si5 | 175.0(12) | O18-Si5-O21 | 116.4(3)  |
| Si4-O19-Si4 | 123.0(22) | O18-Si5-O21 | 116.4(3)  |
| Si4-O20-Si4 | 127.4(19) |             |           |

T-O distances are in Å and T-O-T and O-T-O angles are in degrees. Estimated standard deviations for the last digit are given in the parentheses.
